# Supplementary material for: TBA loop mapping with 3′-inverted-deoxythymidine for fine-tuning of the binding affinity for α-thrombin
Source: Royal Society of Chemistry journal article supplement (doi:10.1039/c9ob00053d), 2019-01-01
Supplement: c9ob00053d1.pdf [file c9ob00053d1.pdf]

Electronic Supplementary Information

**TBA loop mapping with 3'-inverted-deoxythymidine for a fine-tuning of the binding affinity  
for  $\alpha$ -thrombin**

Zhilong Chai, Lei Guo, Hongwei Jin, Yang Li, Shanshan Du, Yucong Shi, Chuhan Wang,  
Weiguo Shi and Junlin He

|                                                                                               |     |
|-----------------------------------------------------------------------------------------------|-----|
| Fig. S1 The purity of TBA analogues by denaturing PAGE (20%, 8 M urea)-----                   | 2   |
| Fig. S2 Mass spectra of TBA and its modified analogues measured with ESI-MS-----              | 2-4 |
| Fig. S3 Melting curves of TBA and its modified analogues-----                                 | 4   |
| Fig. S4 MCK curves of TBA analogues in Na <sup>+</sup> -buffer-----                           | 5   |
| Fig. S5 MCK curves of TBA analogues in K <sup>+</sup> -buffer-----                            | 6   |
| Fig. S6 Molecular dynamics simulation results of aptamer-thrombin complexes-----              | 6   |
| Table S1 Interactions between aptamer-thrombin exosite I by molecular dynamic simulation----- | 7   |

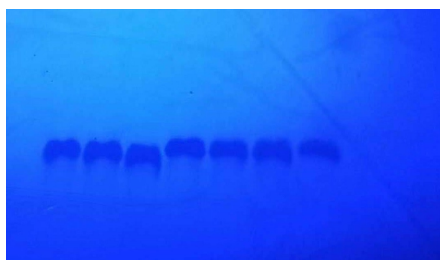

Fig. S1 The purity of TBA analogues by denaturing PAGE (20%, 8 M urea). The bands were shown under UV ( $\lambda = 254$  nm), TBA-<sup>i</sup>T3, TBA-<sup>i</sup>T4, TBA-<sup>i</sup>T7, TBA-G8-<sup>i</sup>T8, TBA-<sup>i</sup>T9, TBA-<sup>i</sup>T12, and TBA-<sup>i</sup>T13 were presented, respectively from left to right.

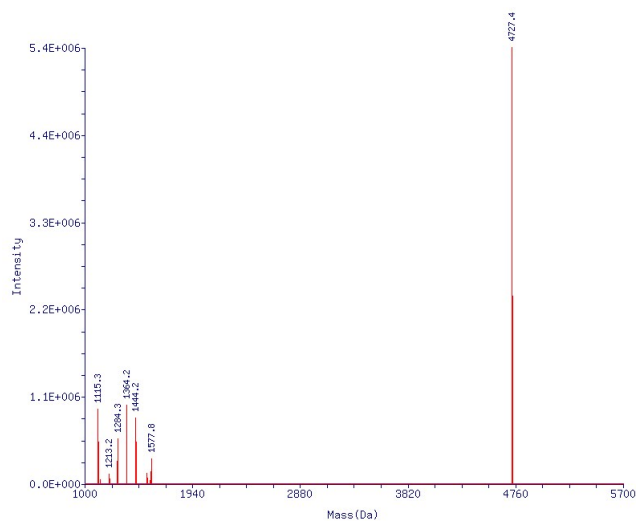

TBA-<sup>i</sup>T3

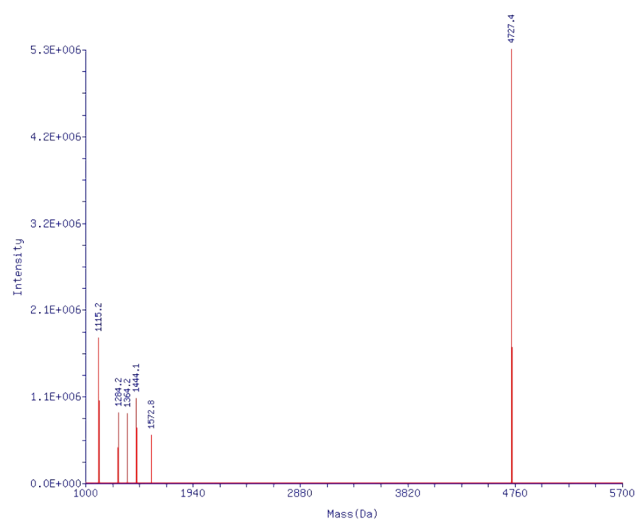

TBA-<sup>i</sup>T4

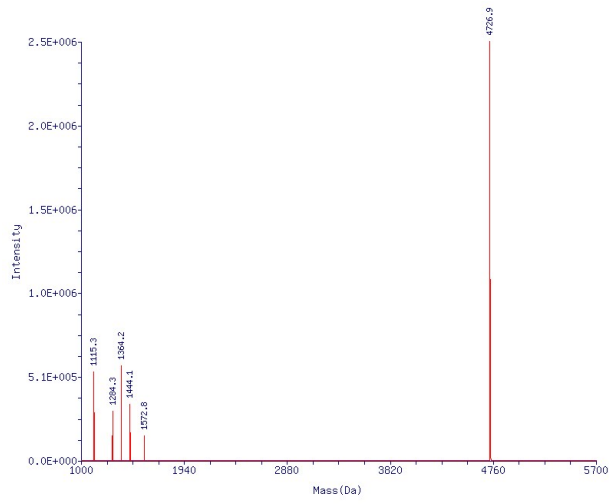

TBA-iT7

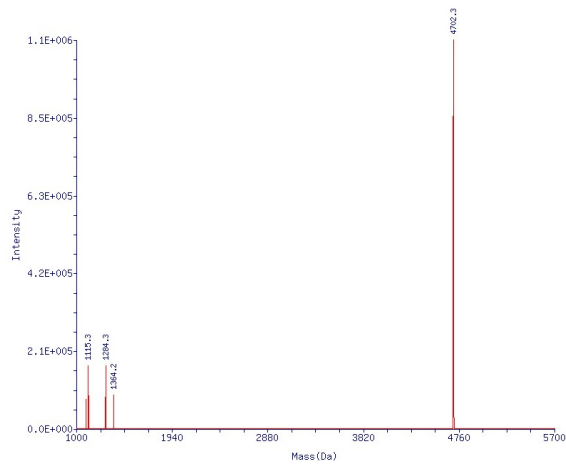

TBA-G8-iT8

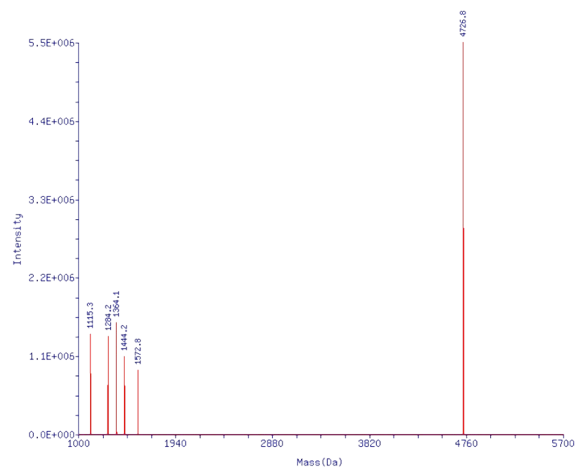

TBA-iT9

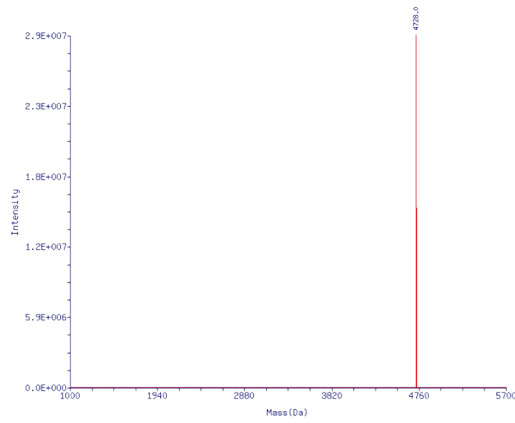

TBA-iT12

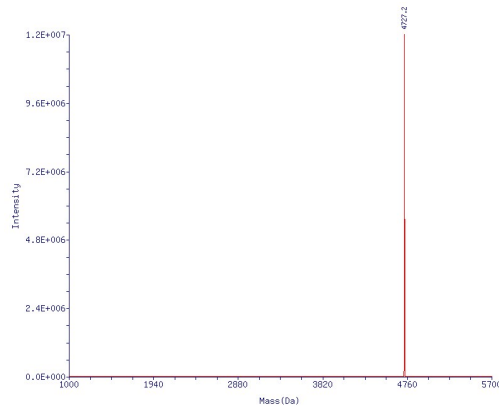

TBA-iT13

Fig. S2 Mass spectra of TBA and its modified analogues. ESI-MS was measured with on a HTCS Oligo LC/MS system (Thermo Finnigan, Somerset, NJ, USA).

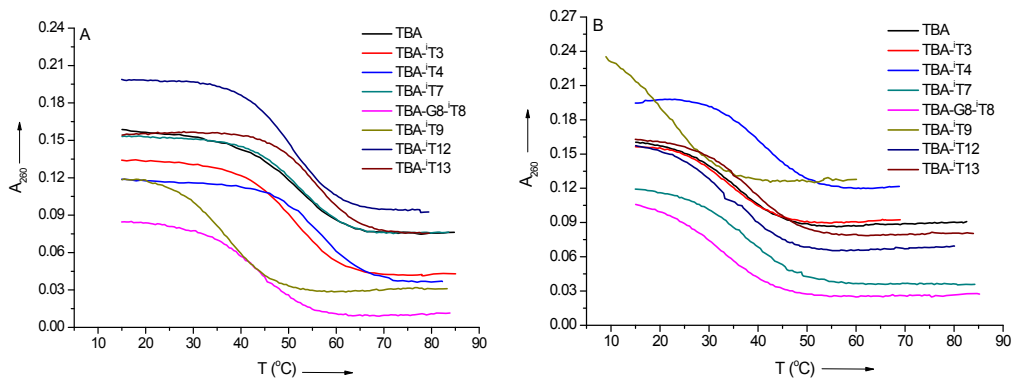

Fig. S3 Melting curves of TBA and its modified analogues. A, TBA analogues in  $K^+$ -buffer (100 mM KCl); B, TBA analogues in  $Na^+$ -buffer (138 mM NaCl, 2.7 mM KCl, 10 mM  $Na_2HPO_4$ , and 1.76 mM  $KH_2PO_4$ , pH 7.4)

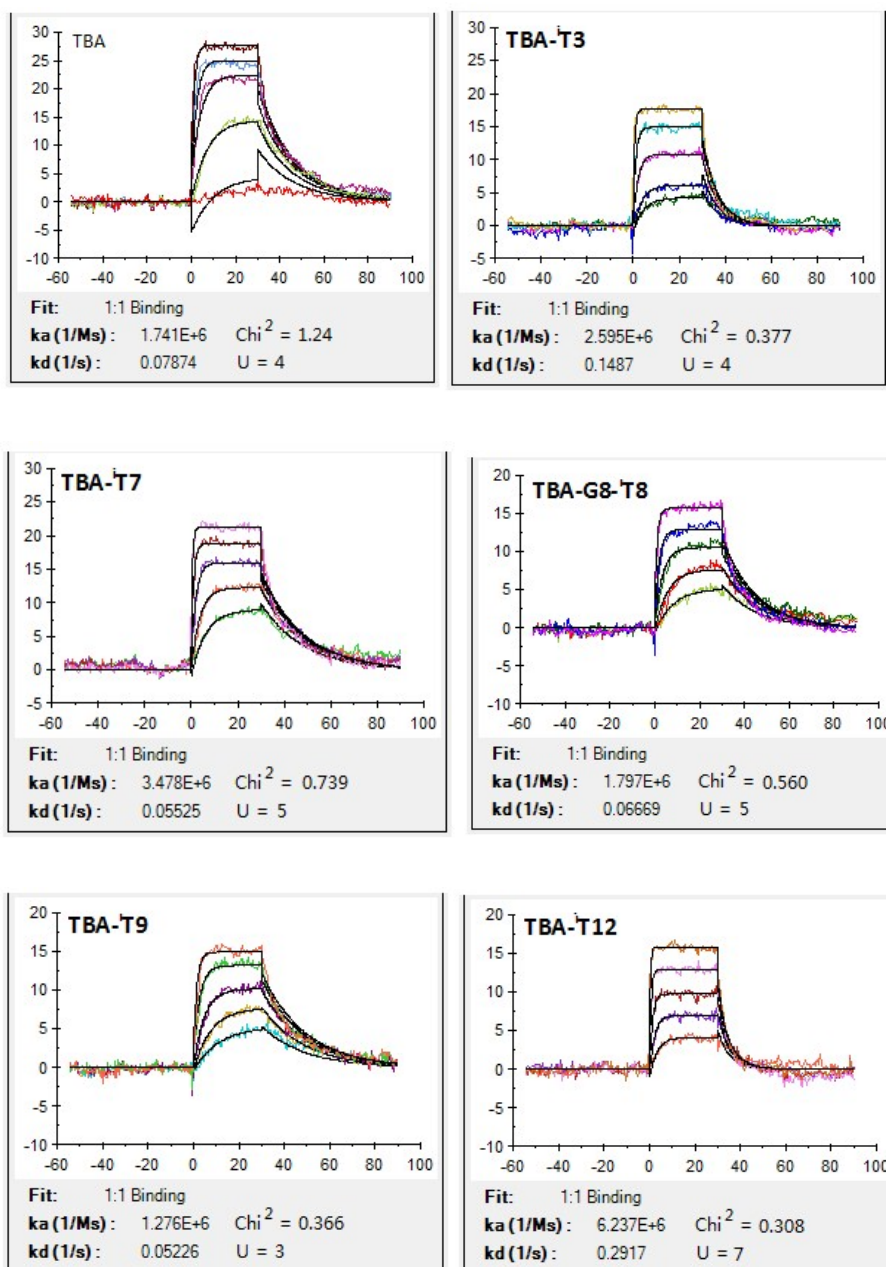

Fig. S4 MCK curves of TBA analogues in  $\text{Na}^+$ -buffer (138 mM NaCl, 2.7 mM KCl, 10 mM  $\text{Na}_2\text{HPO}_4$ , and 1.76 mM  $\text{KH}_2\text{PO}_4$ , pH 7.4).

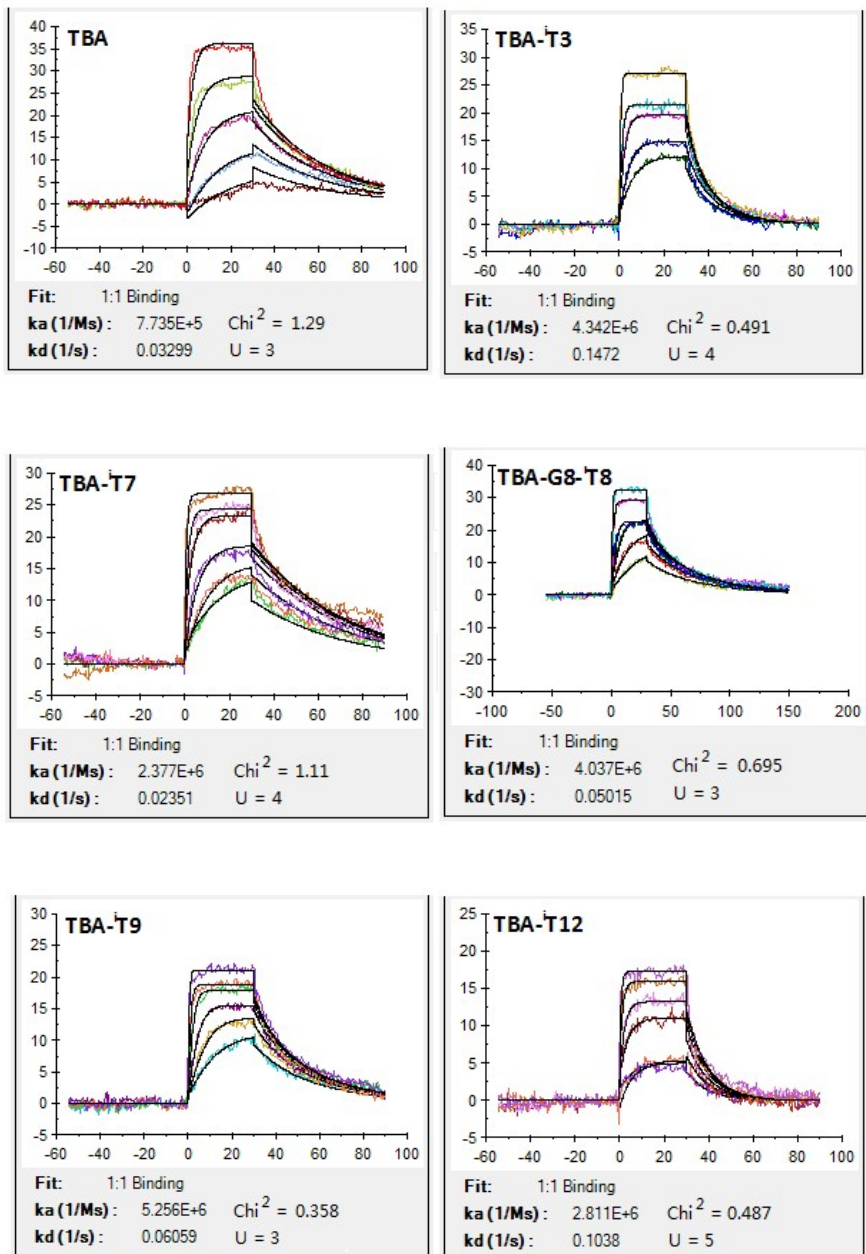

Fig. S5 MCK curves of TBA analogues in K<sup>+</sup>-buffer (100 mM KCl).

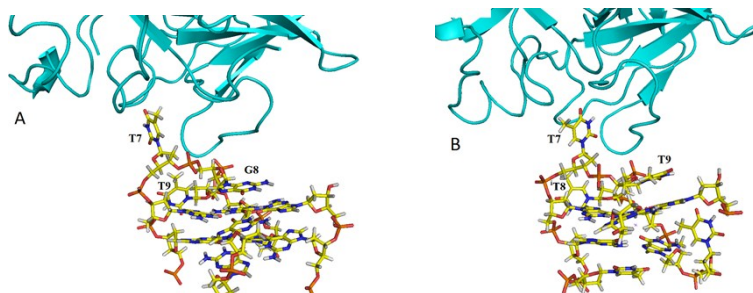

Fig. S6 Molecular dynamics simulation results of aptamer-thrombin complexes. TBA-thrombin (A) and TBA-G8-T9-thrombin (B) complexes were calculated on the base of 1HAP. Thrombin molecule is presented as cartoon, and aptamer molecule is presents as sticks.

Table S1 Interactions between aptamer-thrombin exosite I by molecular dynamic simulation

| interactions  | TBA-thrombin |          | TBA-G8- <sup>i</sup> T8-thrombin |          |
|---------------|--------------|----------|----------------------------------|----------|
|               | TBA          | thrombin | TBA-G8- <sup>i</sup> T9          | thrombin |
| H-bond        | T7           | GLY38    |                                  |          |
| H-bond        | T9           | ASN103   |                                  |          |
| H-bond        | T9           | ARG102   | T9                               | ARG102   |
| H-bond        |              |          | T7                               | GLU101   |
| H-bond        |              |          | <sup>i</sup> T8                  | ARG99    |
| H-bond        |              |          | G10                              | ARG102   |
| Electrostatic | G8           | ARG99    | <sup>i</sup> T8                  | ARG99    |
| Electrostatic |              |          | G10                              | ASN103   |
| Hydrophobic   | T7           | ILE37    | T7                               | ILE37    |
